# MIND TO MIND

*Creative writing that explores the abstract side  
of our profession and our lives*

*Stephen T. Harvey, M.D., Editor*

## Hospital Waiting Room

Andrew Chenevert

A  
A celebrity's polished face assures  
great care is taken to protect  
those inside the magazine. Anyone can forgive  
the discoloration on the floor,  
or a distant flat note breaking through a door  
in the pleasant yellows of the family room.

Here magazines serve two functions,  
the first purely aesthetic:  
to hide the chipping paint on tables.  
The second is to muffle the hours  
of uncertainty entombed inside  
the hospital.

When you get out,  
and your mother is cured, you will  
remember the ad for new lipstick,  
rush to the store, and thank it for showing  
mercy.

---

This poem is one of the finalists of ANESTHESIOLOGY's first annual creative writing competition, The Letheon.  
andrew.chenevert1@gmail.com

Permission to reprint granted to the American Society of Anesthesiologists, Inc., and Wolters Kluwer Health, Inc., by copyright author/owner.  
Anesthesiology 2018; 128:671
